# Supplementary material for: A local insult of okadaic acid in wild-type mice induces tau phosphorylation and protein aggregation in anatomically distinct brain regions
Source: Springer Nature journal article supplement (doi:10.1186/s40478-016-0300-0), 2016-03-31

# Supplementary figure 1

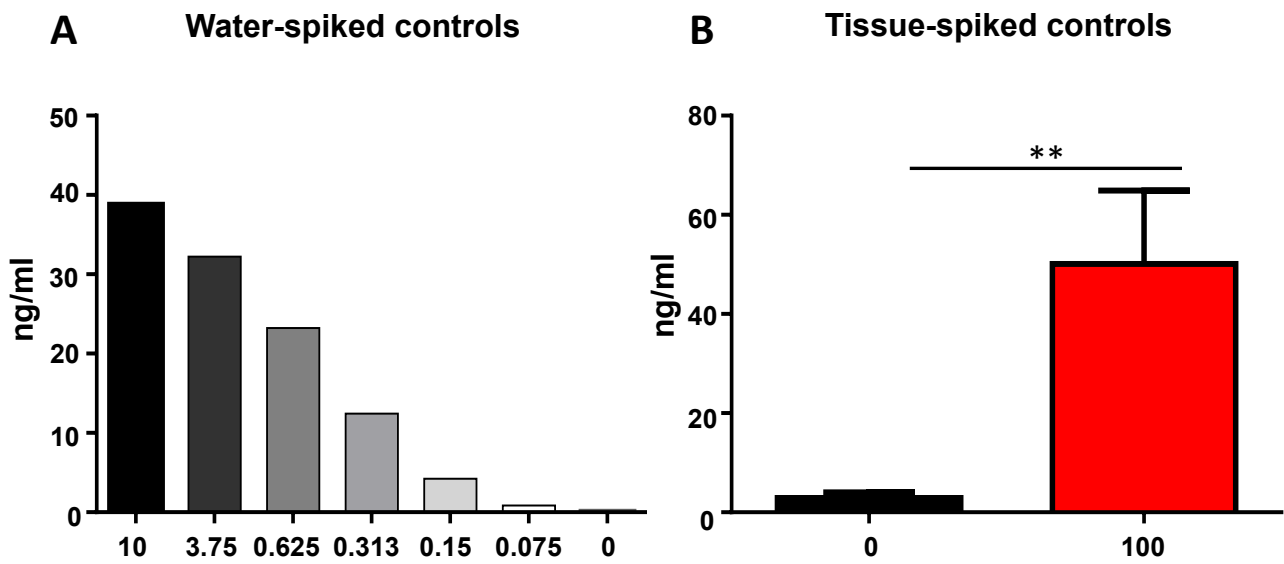

## Supplementary figure 2

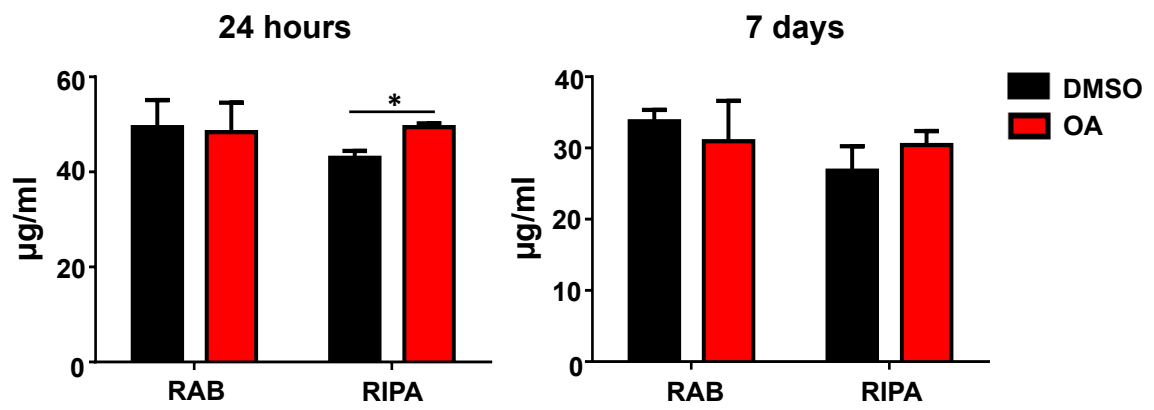

# Supplementary figure 3

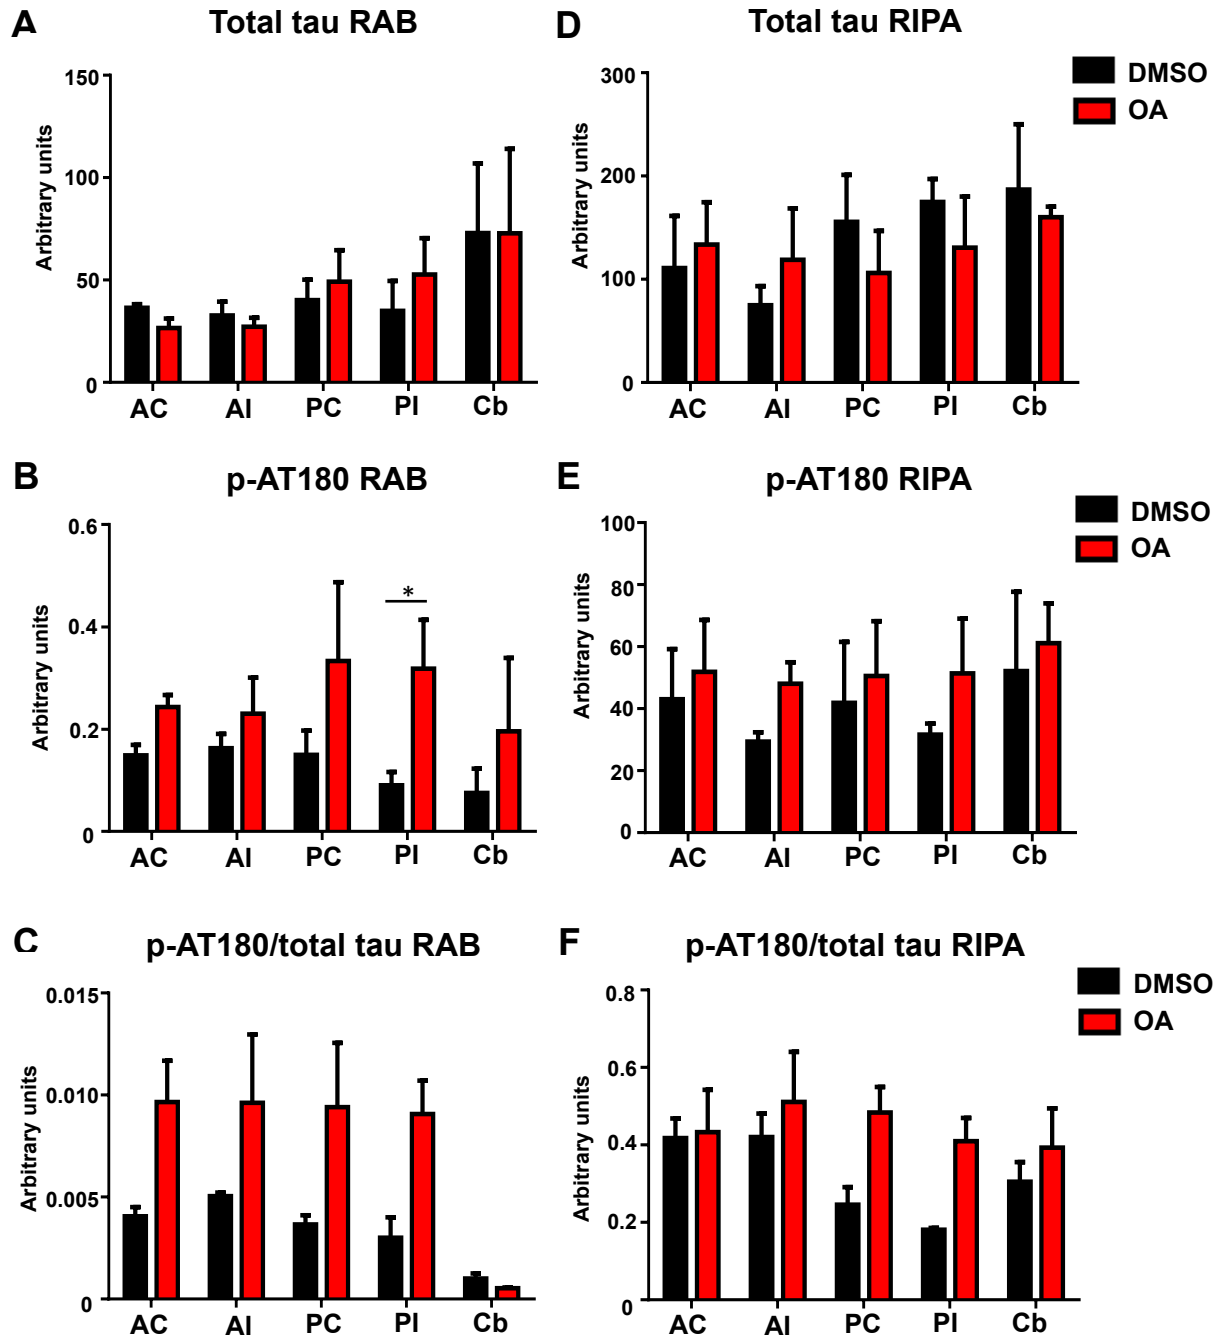

# Supplementary figure 4

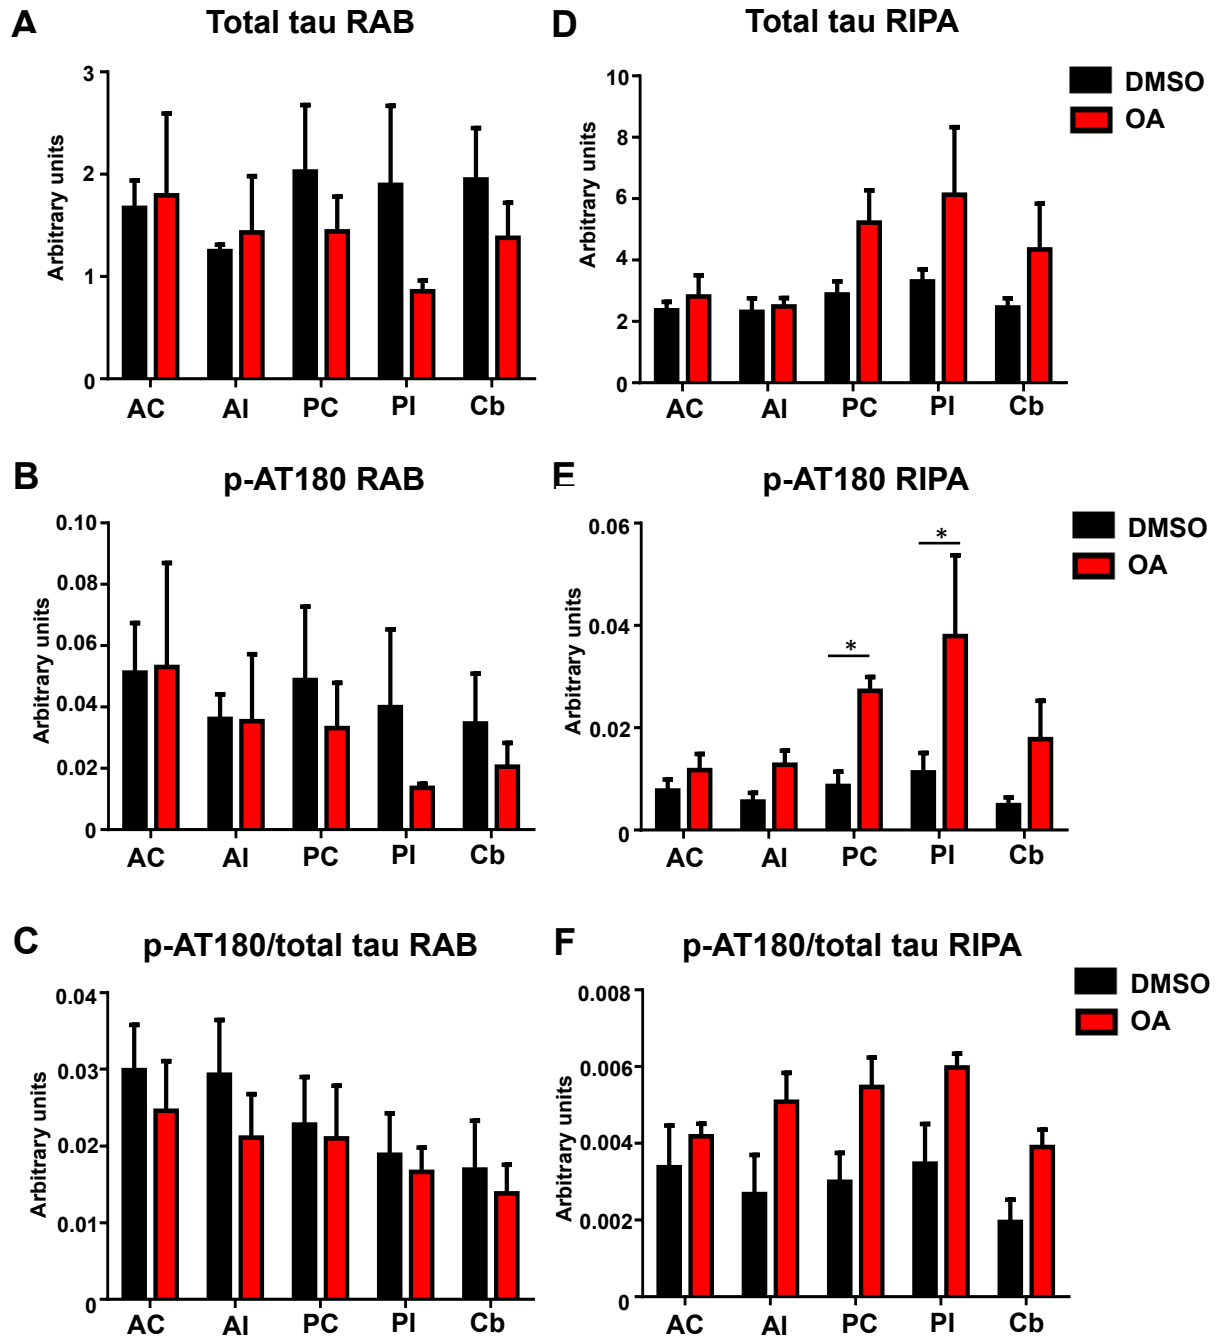

# Supplementary figure 5

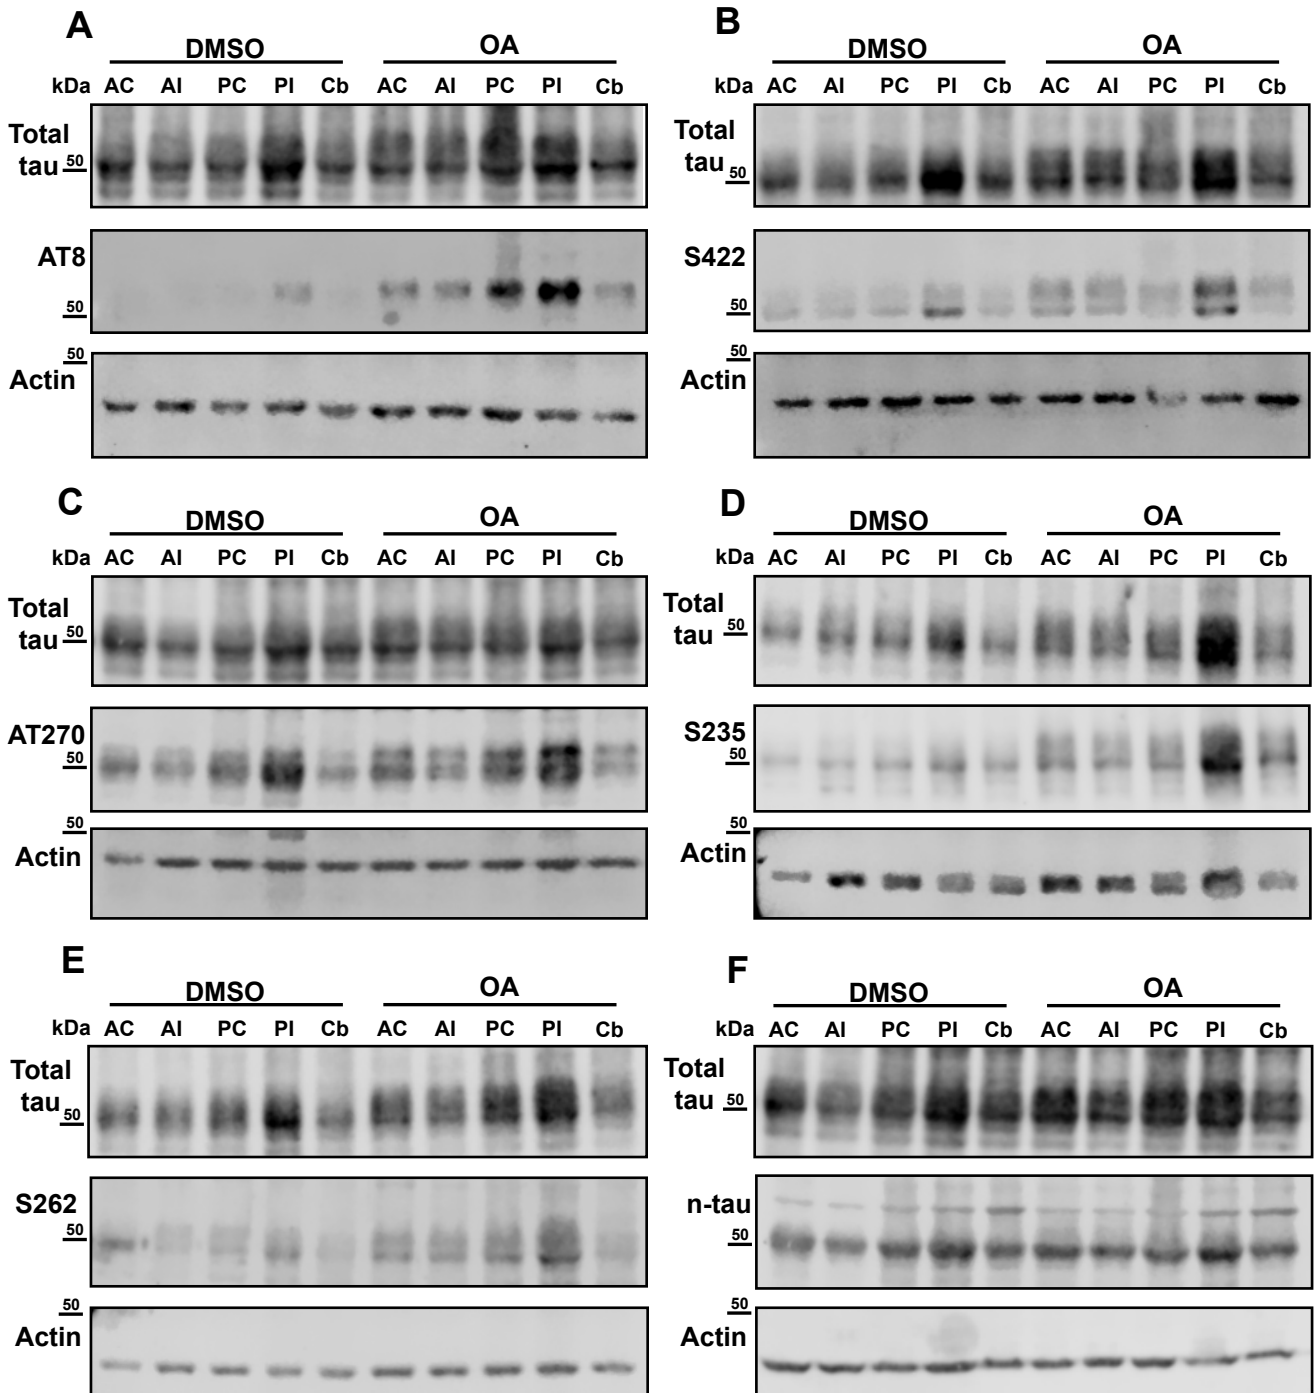

Supplement: MOESM1 [file 25665916]
